# Supplementary material for: Activity and stability studies of H-transfer reduction reactions of aldehydes and ketones over aluminium isopropoxide heterogenised catalysts
Source: Royal Society of Chemistry journal article supplement (doi:10.1039/d2ra06437e), 2022-01-01
Supplement: d2ra06437e1.pdf [file d2ra06437e1.pdf]

# Supporting Information

## Activity and stability studies of H-transfer reduction reactions of aldehydes and ketones over aluminium isopropoxide heterogenised catalysts

Atika Muhammad<sup>a</sup>, Ammaru Ismaila<sup>a</sup>, Bashir Jelani Usman<sup>b</sup>, Graziano Di Carmine<sup>c</sup>, Carmine  
D'Agostino<sup>a, d\*</sup>

<sup>a</sup>Department of Chemical Engineering, The University of Manchester, Oxford Road, M13  
9PL, United Kingdom

<sup>b</sup>Department of Materials, The University of Manchester, Oxford Road, M13 9PL  
Manchester, United Kingdom

<sup>c</sup>Dipartimento di Scienze Chimiche, Farmaceutiche ed Agrarie, Università degli Studi di  
Ferrara, Via L. Borsari, 46, I-44121 Ferrara, Italy

<sup>d</sup>Dipartimento di Ingegneria Civile, Chimica, Ambientale e dei Materiali (DICAM), Alma  
Mater Studiorum – Università di Bologna, Via Terracini, 28, 40131 Bologna, Italy

\*Corresponding Author:

Dr Carmine D'Agostino

Email: [carmine.dagostino@manchester.ac.uk](mailto:carmine.dagostino@manchester.ac.uk); [carmine.dagostino@unibo.it](mailto:carmine.dagostino@unibo.it)

The yield was calculated using the following expression:

$$Y(\%) = \frac{\text{moles of product}}{\text{initial moles of limiting reactant}} \times 100$$

Equation S1

The turnover frequency (TOF) was determined using the expression:

$$TOF = \frac{mmol_{product}}{mmol_{catalyst} \times time(s)}$$

Equation S2

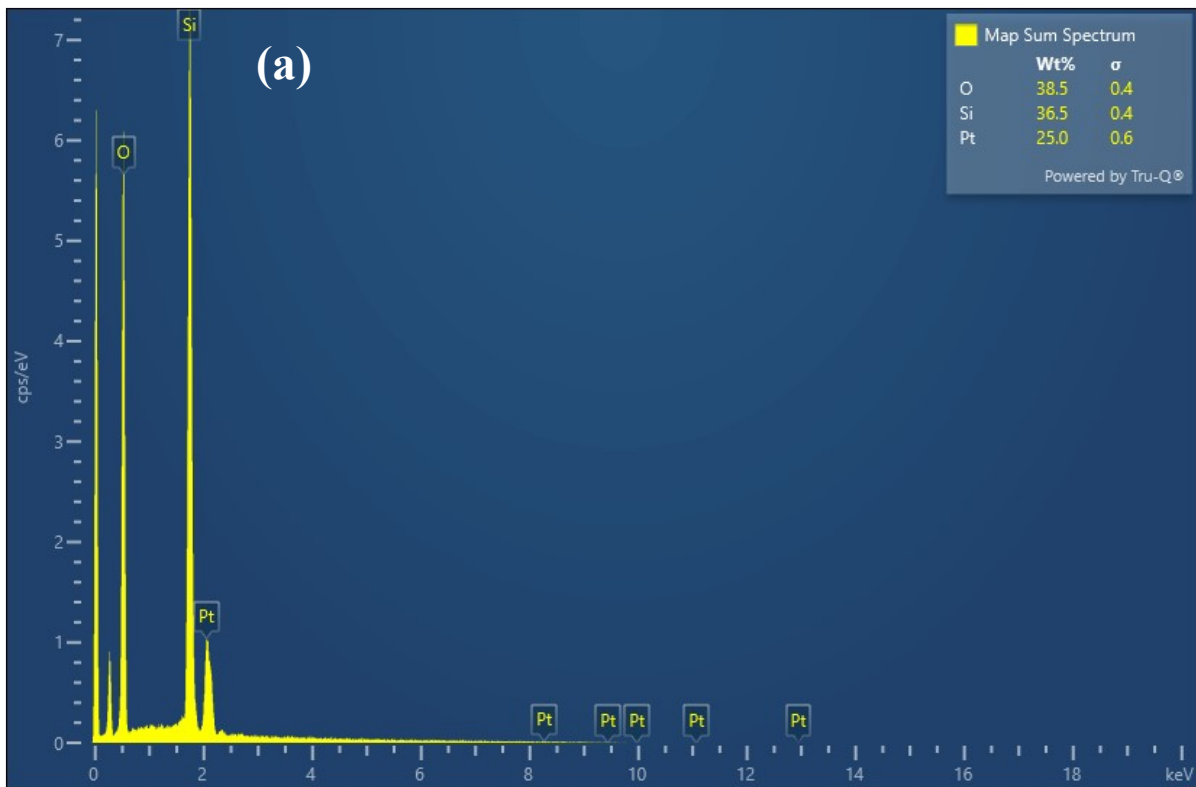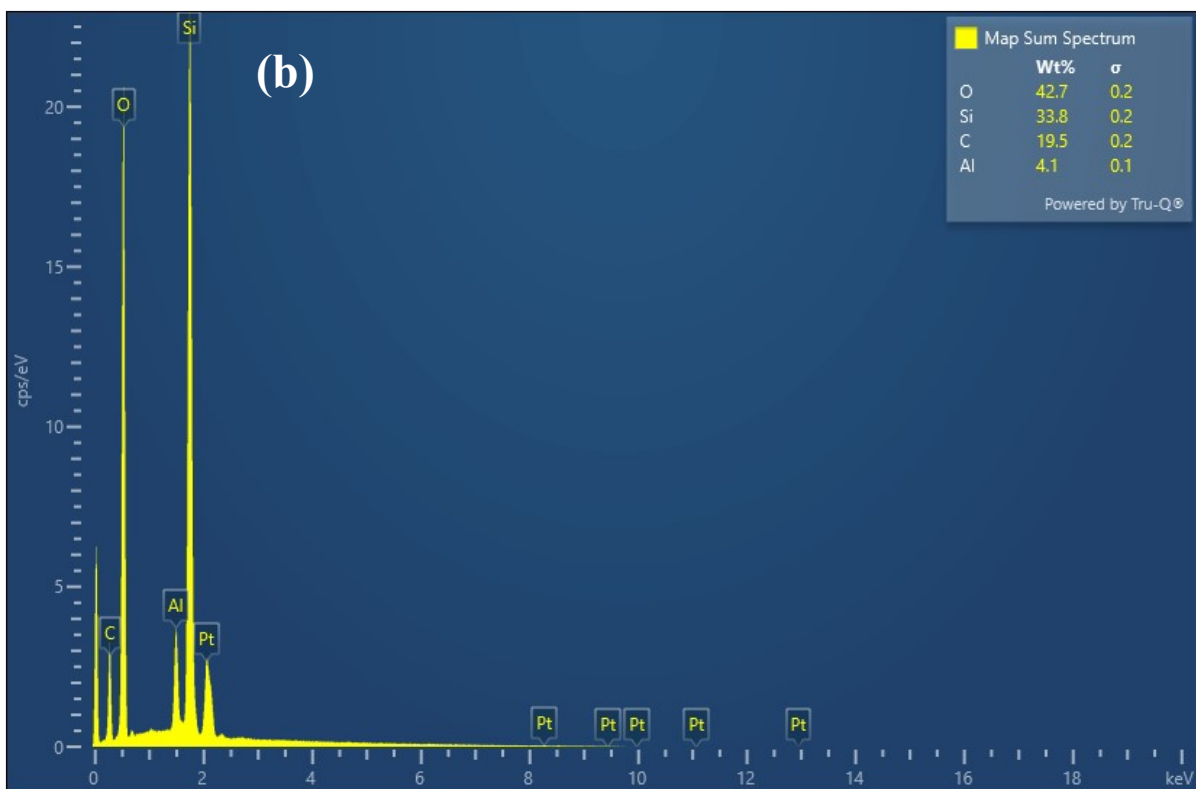

**Figure S1.** EDX spectrum of (a)  $\text{SiO}_2$  and (b)  $\text{Al}(\text{O}^i\text{Pr})_3\text{-SiO}_2$ . Pt comes from the coating of the sample as part of sample preparation for the analysis.

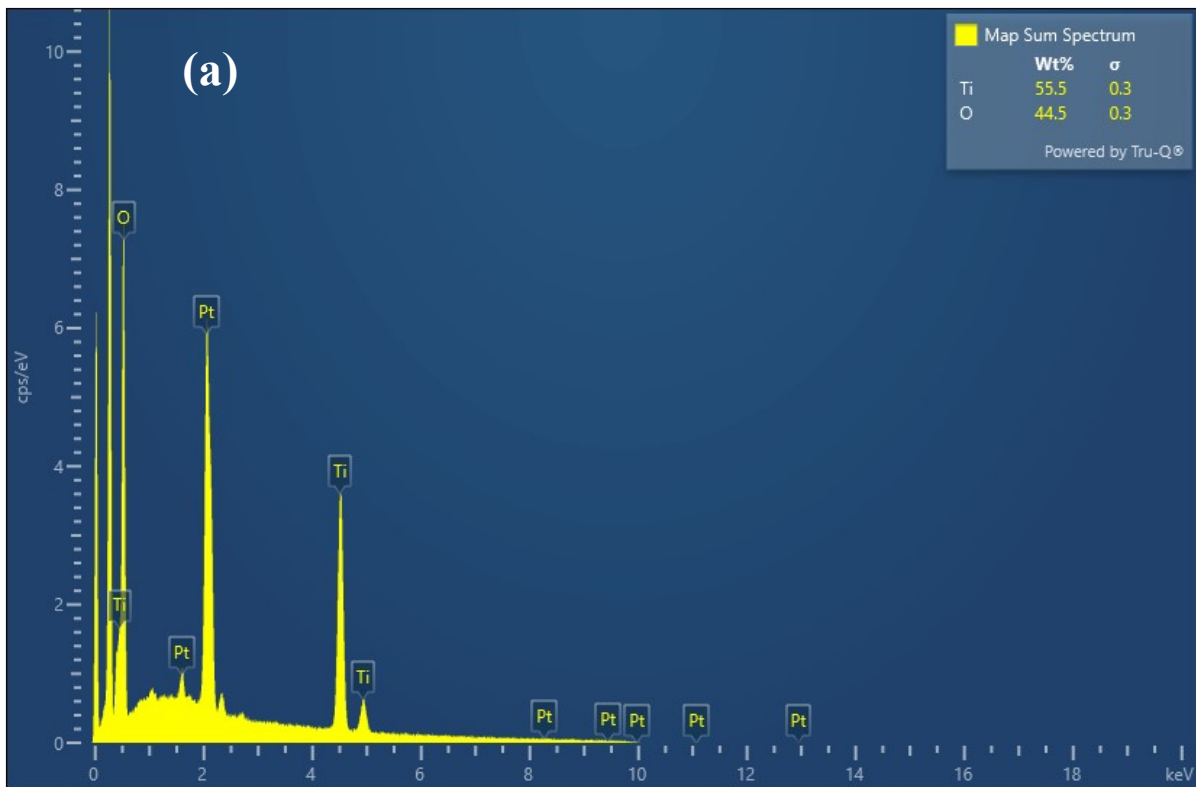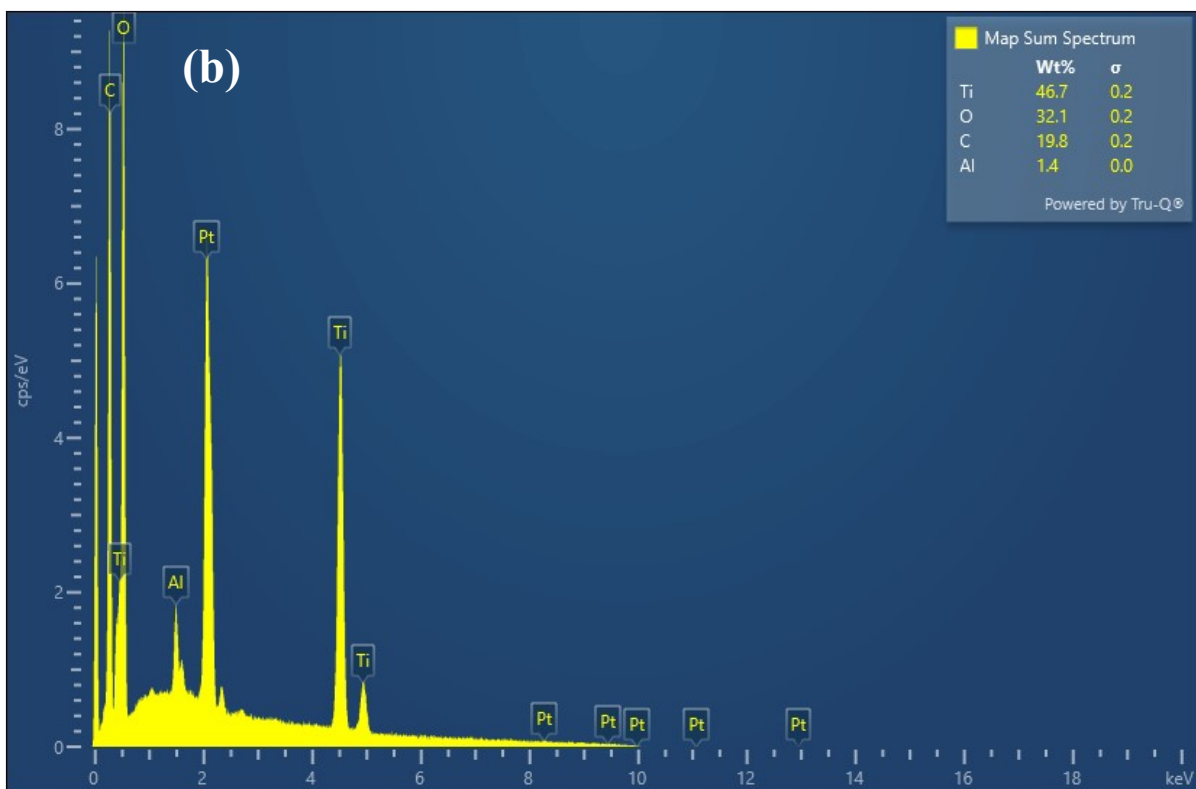

**Figure S2.** EDX spectrum of (a)  $\text{TiO}_2$  and (b)  $\text{Al}(\text{O}^i\text{Pr})_3\text{-TiO}_2$ . Pt comes from the coating of the sample as part of sample preparation for the analysis.

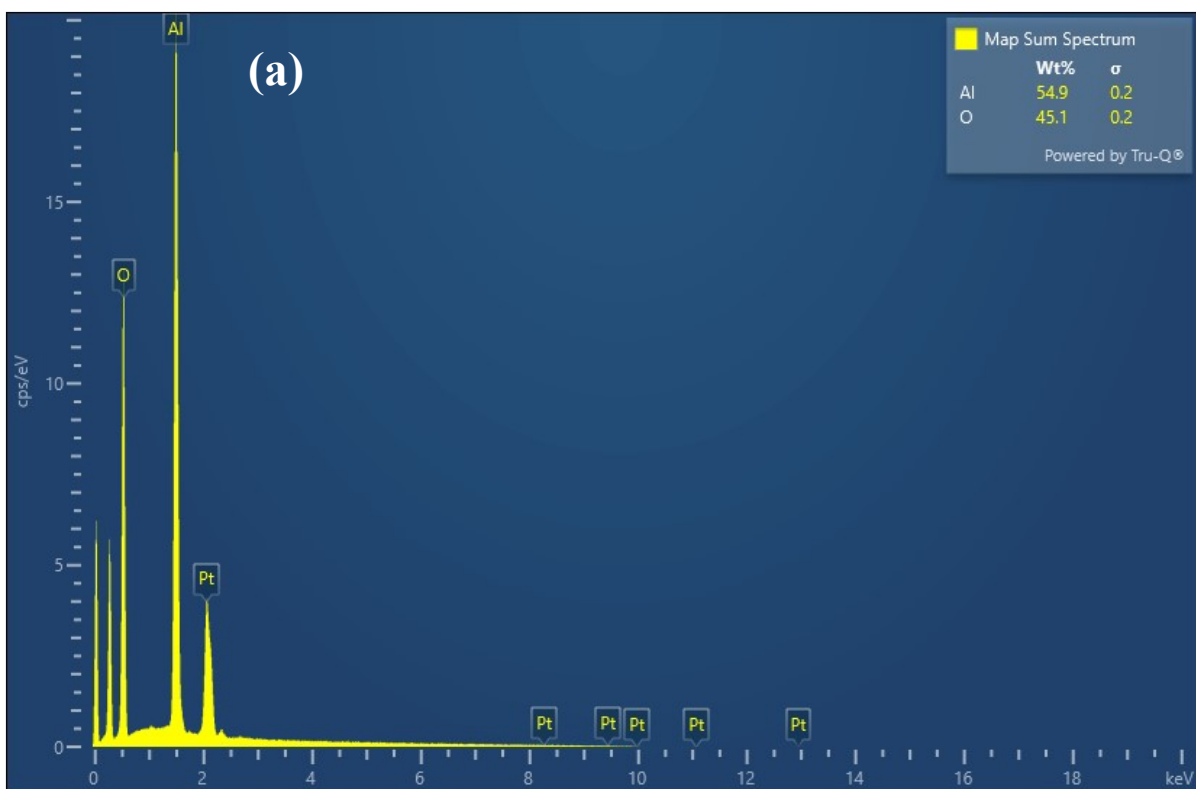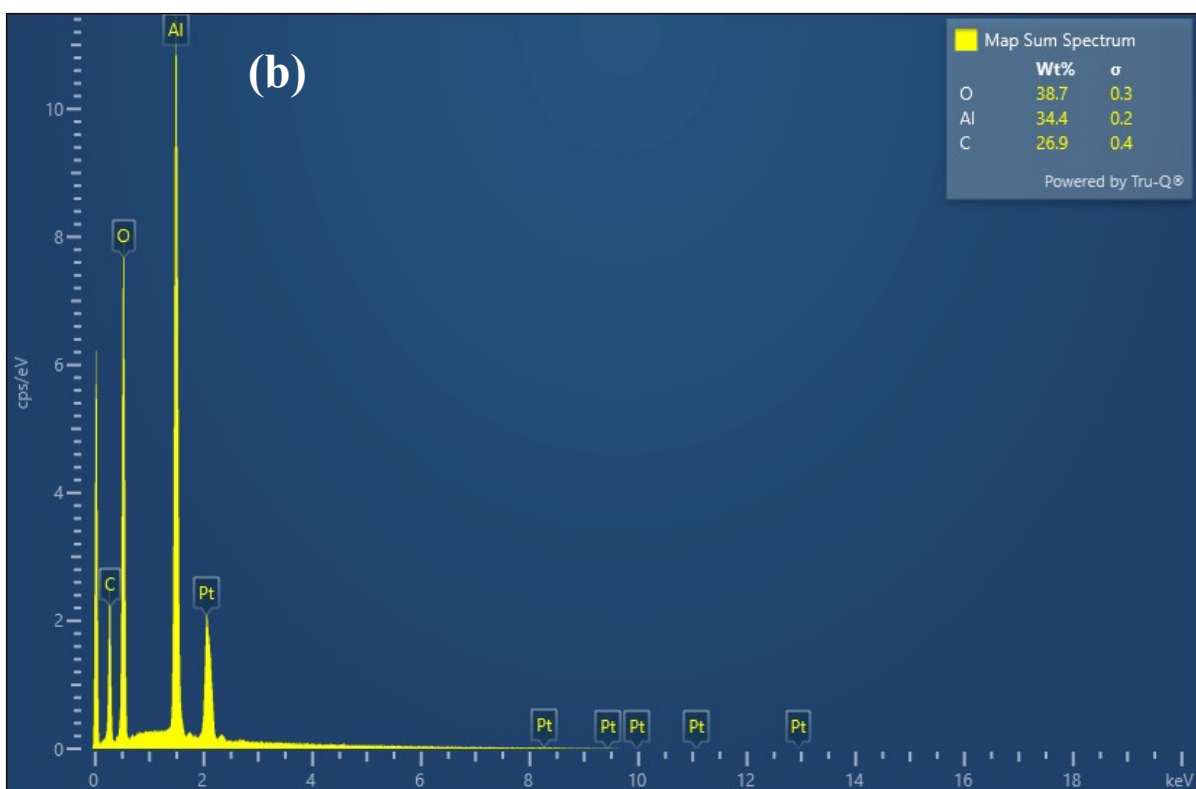

**Figure S3.** EDX spectrum of (a)  $\text{Al}_2\text{O}_3$  and (b)  $\text{Al}(\text{O}^i\text{Pr})_3\text{-Al}_2\text{O}_3$ . Pt comes from the coating of the sample as part of sample preparation for the analysis.

**Table S1.** Reaction data for the MPV reduction of aldehydes and ketones using heterogenised catalysts.

| Substrate                                                                                            | $\text{Al}(\text{O}^i\text{Pr})_3\text{-SiO}_2$ |           |                 | $\text{Al}(\text{O}^i\text{Pr})_3\text{-TiO}_2$ |           |                 | $\text{Al}(\text{O}^i\text{Pr})_3\text{-Al}_2\text{O}_3$ |           |                 |
|------------------------------------------------------------------------------------------------------|-------------------------------------------------|-----------|-----------------|-------------------------------------------------|-----------|-----------------|----------------------------------------------------------|-----------|-----------------|
|                                                                                                      | Time (h)                                        | Yield (%) | Selectivity (%) | Time (h)                                        | Yield (%) | Selectivity (%) | Time (h)                                                 | Yield (%) | Selectivity (%) |
| 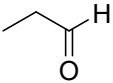<br>Propionaldehyde | 4                                               | 92.5      | 100             | 4                                               | 85.2      | 100             | 4                                                        | 89.9      | 100             |
| <br>Cinnamaldehyde  | 4                                               | 55.4      | 100             | 6                                               | 50.1      | 100             | 6                                                        | 54.6      | 100             |
| <br>Benzaldehyde    | 3                                               | 95.7      | 100             | 3                                               | 87.7      | 100             | 3                                                        | 91.2      | 100             |
| <br>Cyclohexanone | 5                                               | 77.5      | 100             | 5                                               | 72.2      | 100             | 5                                                        | 75.6      | 100             |
| <br>Acetophenone  | 5                                               | 49.5      | 100             | 5                                               | 45.5      | 100             | 5                                                        | 48.4      | 100             |
